# Supplementary material for: Highly stretchable and elastic PEDOT:PSS helix fibers enabled wearable sensors
Source: Royal Society of Chemistry journal article supplement (doi:10.1039/d3tc02381h), 2023-01-01
Supplement: d3tc02381h1.pdf [file d3tc02381h1.pdf]

## Supporting Information

### Highly stretchable and elastic PEDOT: PSS helix fibers enabled wearable sensors

Jing Chen,<sup>a</sup> Jiadeng Zhu,<sup>b</sup> Zhongrui Wei,<sup>a</sup> Ziwei Chen,<sup>a</sup> Chunhong Zhu,<sup>c</sup> Qiang Gao<sup>a</sup> and Chunxia Gao<sup>\*a</sup>

<sup>a</sup>*School of Chemistry and Chemical Engineering, Yangzhou University, Yangzhou 225002, China.*

<sup>b</sup>*Chemical Sciences Division, Oak Ridge National Laboratory, Oak Ridge, TN 37831, USA*

<sup>c</sup>*Faculty of Textile Science and Technology, Shinshu University, Ueda 386-8567, Nagano, Japan*

**Corresponding author:** Dr. Chunxia Gao ([cxgao@yzu.edu.cn](mailto:cxgao@yzu.edu.cn))

**Video S1.** A video demonstrating the spinning of self-helical PEDOT:PSS fibers.

**Video S2.** Following tensile deformation of about 400% in water, PEDOT: PSS-Mg self-helical fiber is shown in a video regaining its initial length.

**Video S3.** PEDOT: PSS-Mg self-helical fibers can quickly self-recover within a specific stretch range.

**Video S4.** Demonstration of the human-computer interaction system.



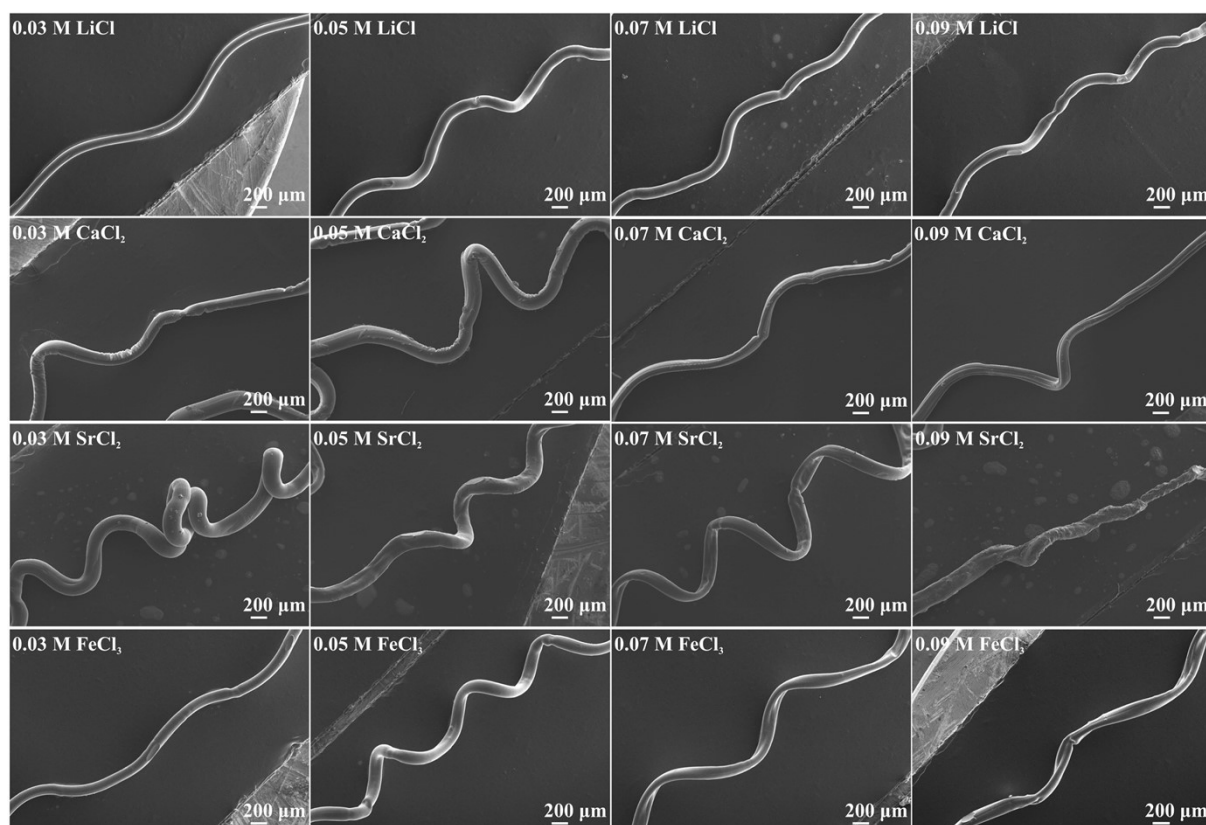

**Fig. S1.** SEM images of PEDOT: PSS fibers prepared by co-doping 20 vol% phosphoric acid with 0.03 M a), 0.05 M b), 0.07 M c) and 0.09 M d) LiCl; with 0.03 M e), 0.05 M f), 0.07 M g), and 0.09 M h) CaCl<sub>2</sub>; with 0.03 M i), 0.05 M j), 0.07 M k), and 0.09 M l) SrCl<sub>2</sub>; with 0.03 M a), 0.05 M b), 0.07 M c), and 0.09 M d) FeCl<sub>3</sub>.

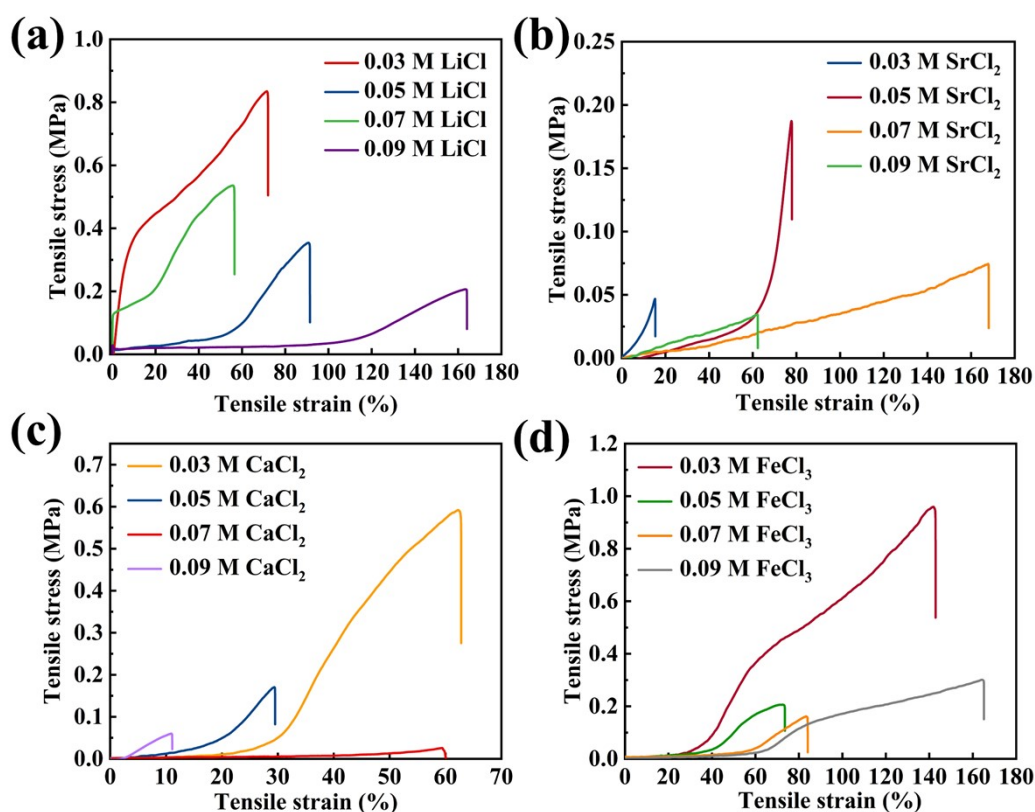

**Fig. S2.** Stress-strain curves of helical PEDOT: PSS fibers prepared by co-doping 20 vol% phosphoric acid and different concentrations of LiCl in solidification bath a). Stress-strain curves of helical PEDOT: PSS fibers created by co-doping in solidification bath with 20 vol% phosphoric acid and various SrCl<sub>2</sub> concentrations b). Stress-strain profiles of helical PEDOT: PSS fiber fibers produced by co-doping 20 vol% phosphoric acid and various calcium chloride concentrations c). Stress-strain curves of helical PEDOT: PSS fibers prepared by co-doping 20 vol% phosphoric acid and different concentrations of FeCl<sub>3</sub> d).

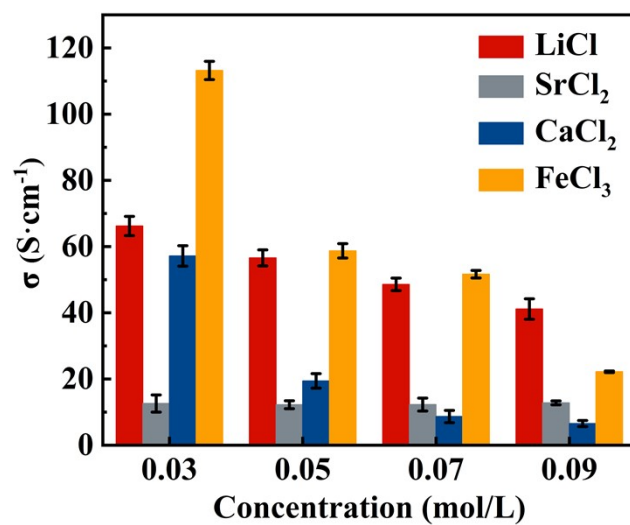

**Fig. S3.** The conductivity of the prepared helical PEDOT: PSS fibers changed when various concentrations of LiCl, SrCl<sub>2</sub>, CaCl<sub>2</sub>, and FeCl<sub>3</sub> were added to the solidification bath along with 20 vol% phosphoric acid.

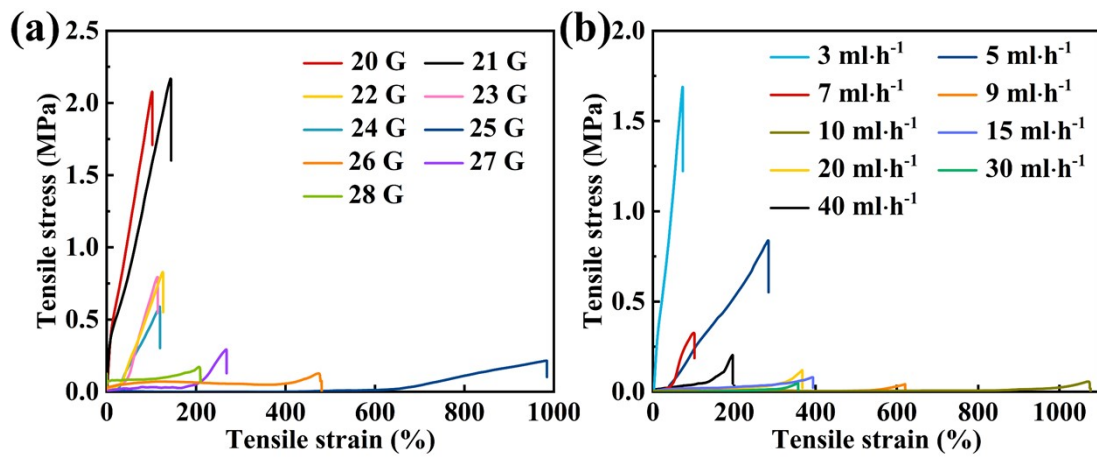

**Fig. S4.** Stress-strain curves of helical PEDOT: PSS fibers prepared with different-sized needles  
 a). Stress-strain curves of PEDOT: PSS helical fibers prepared at different extrusion rates b).

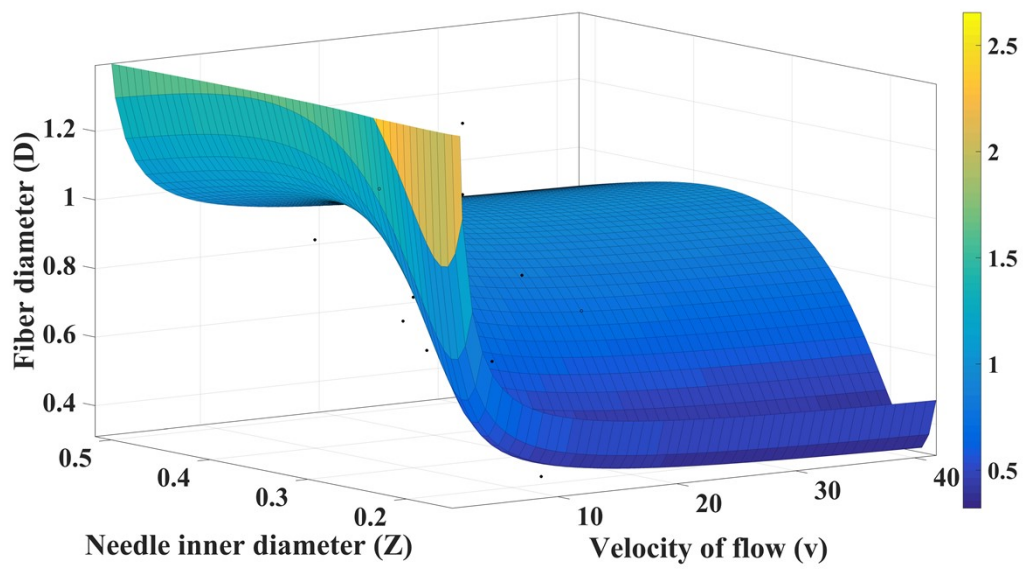

**Fig. S5.** Schematic for a data model that fits helix diameter, flow rate, and needle inner diameter.



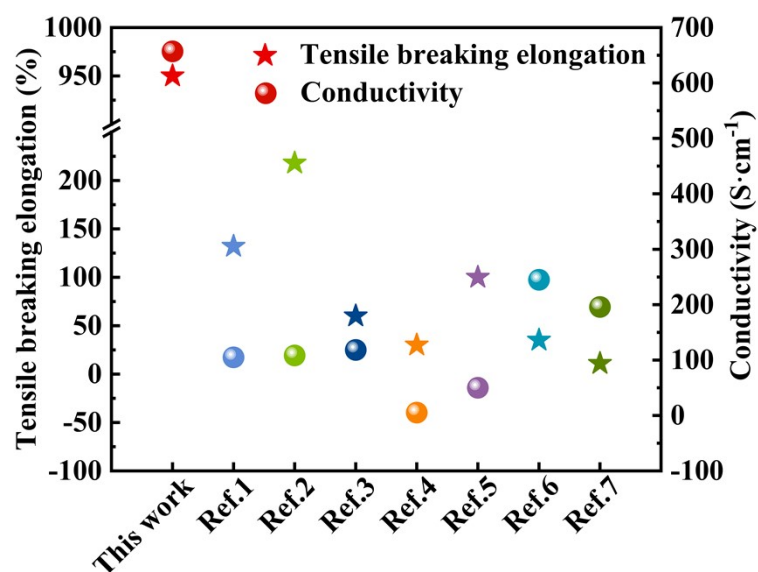

**Fig. S6.** Tensile strain and conductivity of PEDOT: PSS fiber in comparison with the reported strain sensors in references.

## References

1. Q. Gao, Y. Wang, P. Wang, M. Shen, T. Li, C. Gao and J. Zhu, *Advanced Engineering Materials*, 2021, **24**, 2101448.
2. Q. Gao, Y. Zhang, P. Wang, J. Zhu and C. Gao, *Composites Communications*, 2023, **40**, 101623.
3. C. Zhao, C. Zhang, P. Wang, Z. Chen, Y. Wang, J. Zhu, C. Gao and Q. Gao, *European Polymer Journal*, 2023, **190**, 112025.
4. P. Wang, M. Wang, J. Zhu, Y. Wang, J. Gao, C. Gao and Q. Gao, *Chemical Engineering Journal*, 2021, **425**, 131551.
5. Y. Wang, C. Gao, C. Zhao, Z. Chen, H. Ye, M. Shen, Q. Gao, J. Zhu and T. Chen, *ACS Applied Materials Interfaces*, 2023, **15**, 17175-17187.
6. Y. Kim, A. Lund, H. Noh, A. I. Hofmann, M. Craighero, S. Darabi, S. Zokaei, J. I. Park, M. H. Yoon and C. Müller, *Macromolecular Materials Engineering*, 2020, **305**, 1900749.
7. J. Yang, Y. Jia, Y. Liu, P. Liu, Y. Wang, M. Li, F. Jiang, X. Lan and J. Xu, *Composites Communications*, 2021, **27**, 100855.

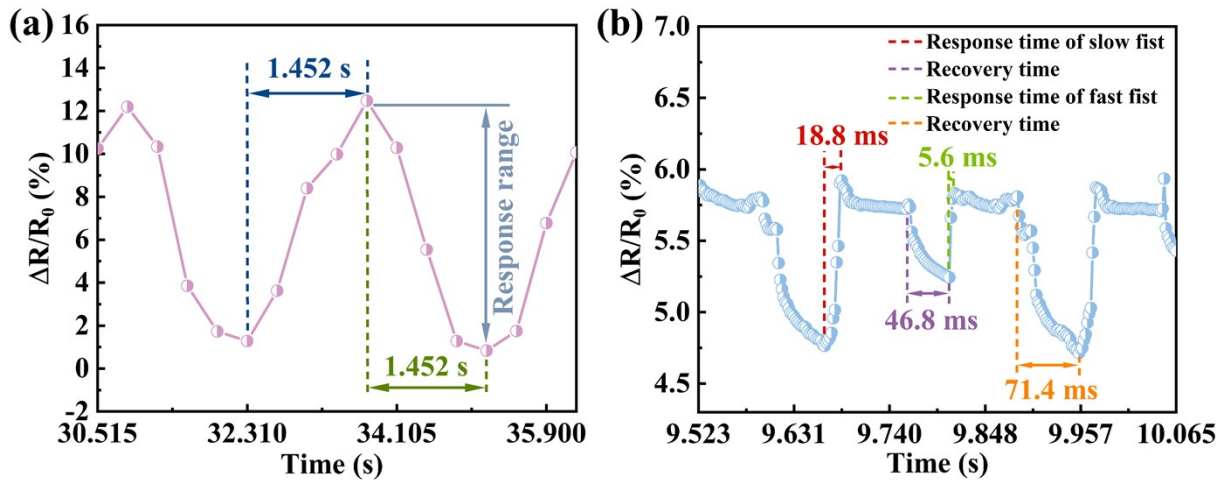

**Fig. S7.** Response/recovery time of the stain sensor with manipulator finger bending cycles a). Response/recovery time of PEDOT: PSS-Mg helix fiber sensor with mechanical hand gripping at different speeds b).

As shown in **Fig.S7 (a)**, the resistance response and recovery of a manipulator finger connected to a solitary PEDOT: PSS-Mg helix fiber when subjected to cycles of bending and stretching. When developing a program for fiber control using a single finger, it is necessary to demonstrate the controllability of fiber. To achieve this, we intentionally configure a slow robot motion speed and introduce a delay of 1000 ms (see **Fig.S7(a)**), resulting in a response time of up to 1.452s. The resistance change time of the flexible sensor made of PEDOT: PSS-Mg helix fibers in response to the mechanical palm gripping speed is depicted in **Fig.S7(b)**. In this program, the manipulator's action execution time is 1 ms (see **Fig.S8(c)**). The obtained data results indicate that the PEDOT: PSS-Mg helix fiber has a notable capacity for a rapid response within a specific range of deformation. The two tests exhibit the possible controllability of spiral fibers in practical applications.

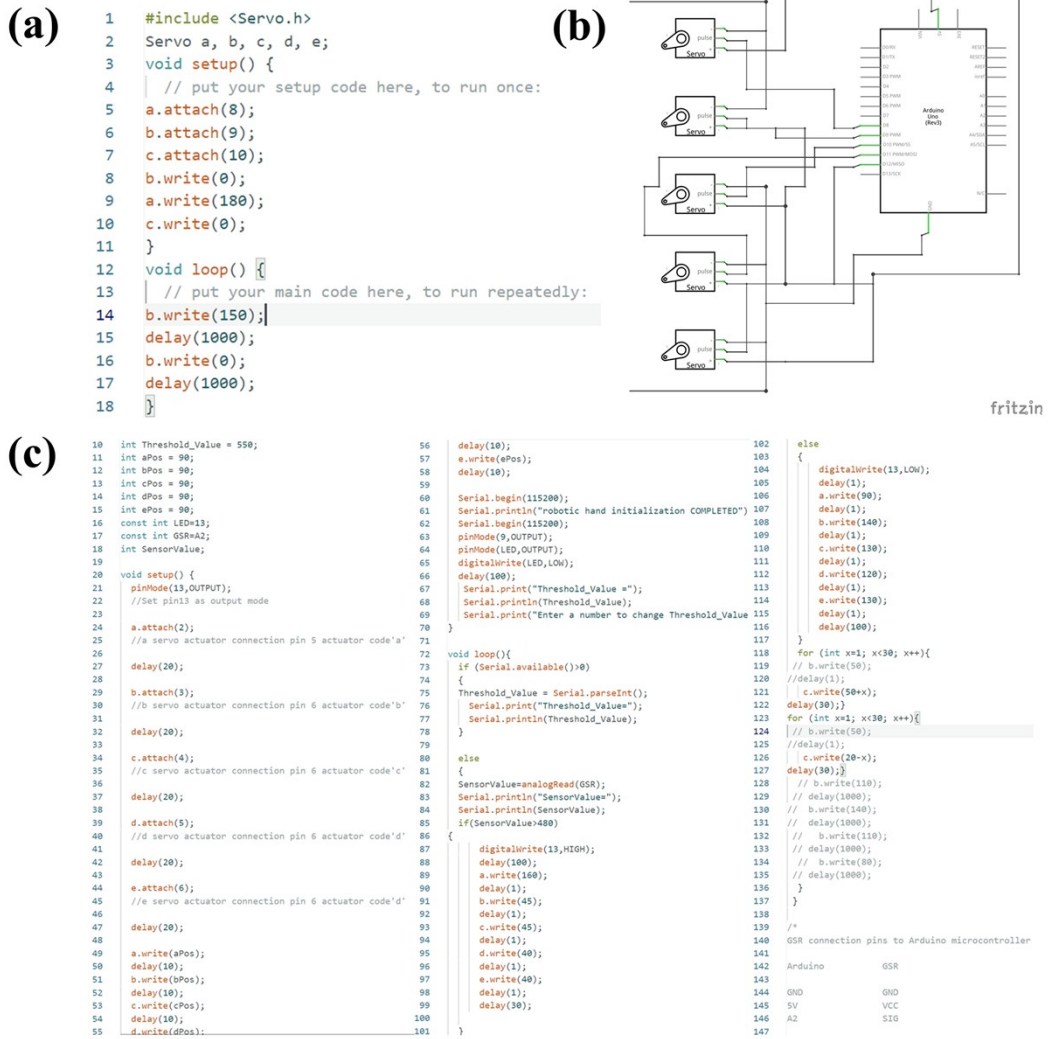

**Fig. S8.** Control program of the flexible sensor control manipulator finger a). Circuit diagram of the flexible sensor control human-computer interaction system b) and the control program c).
